# Supplementary material for: Charging Station Location and Sizing for Electric Vehicles Under Congestion
Source: Atypon-hosted journal article supplement (doi:10.1287/trsc.2021.0494), 2023-06-16
Supplement: trsc.2021.0494.sm1.pdf [file trsc.2021.0494.sm1.pdf]

## Appendix A: DLP Model

$$[\text{DLP}] \text{ minimize } \sum_{j \in N} (f(y_j) + g(z_j)) \quad (1)$$

$$\text{s.t. } z_j \leq C y_j \quad j \in N \quad (2)$$

$$\sum_{j:(i,j) \in A_k} x_{ijk} - \sum_{j:(j,i) \in A_k} x_{jik} = \begin{cases} 1, & \text{if } i = O_k, \\ -1, & \text{if } i = D_k, \\ 0, & \text{otherwise.} \end{cases} \quad i \in N_k, \quad k \in K \quad (8)$$

$$\sum_{i:(i,j) \in A_k} x_{ijk} \leq y_j \quad j \in N_k, \quad j \neq D_k, \quad k \in K \quad (9)$$

$$\sum_{(i,j) \in A_k} \delta_{ij} x_{ijk} \leq (1 + \tau) \delta_{O_k D_k} \quad k \in K \quad (10)$$

$$\theta_{ik} - \theta_{D_k k} + \delta_{i D_k} \phi_k \leq \delta_{i D_k} \quad k \in K, (i, D_k) \in A_k \quad (13)$$

$$\theta_{ik} - \theta_{jk} + \gamma_{jk} + \delta_{ij} \phi_k \leq \delta_{ij} \quad k \in K, (i, j) \in A_k, j \neq D_k \quad (14)$$

$$\sum_{(i,j) \in A_k} \delta_{ij} x_{ijk} = (\theta_{O_k k} - \theta_{D_k k}) + \sum_{j \in N_k} q_{jk} + \delta_{O_k D_k} (1 + \tau) \phi_k \quad k \in K \quad (18)$$

$$q_{jk} \geq \bar{\gamma}_{jk} y_j \quad j \in N_k, k \in K \quad (19)$$

$$q_{jk} \geq \gamma_{jk} \quad j \in N_k, k \in K \quad (20)$$

$$q_{jk} \leq \gamma_{jk} - (1 - y_j) \bar{\gamma}_{jk} \quad j \in N_k, k \in K \quad (21)$$

$$\Lambda_j = \sum_{i:(i,j) \in A} \sum_{k \in K} \lambda_k x_{ijk} \quad j \in N \quad (23)$$

$$\Lambda_j \leq \mu z_j - \epsilon \quad j \in N \quad (24)$$

$$\sum_{m=1}^C s_{jm} = 1 \quad j \in N \quad (27)$$

$$\Lambda_j \leq \sum_{m=1}^C b_m s_{jm} \quad j \in N \quad (28)$$

$$\Lambda_j \geq \sum_{m=2}^C b_{m-1} s_{jm} \quad j \in N \quad (29)$$

$$z_j \geq \sum_{m=1}^C m s_{jm} \quad j \in N \quad (30)$$

$$y_j \in \{0, 1\} \quad j \in N \quad (4)$$

$$z_j \geq 0 \text{ and integer} \quad j \in N \quad (5)$$

$$x_{ijk} \in \{0, 1\} \quad (i, j) \in A_k, \quad k \in K \quad (11)$$

$$\theta_{jk} \text{ free} \quad j \in N_k, k \in K \quad (15)$$

$$\gamma_{jk} \leq 0 \quad j \in N_k, k \in K \quad (16)$$

$$\phi_k \leq 0 \quad k \in K \quad (17)$$

$$q_{jk} \leq 0 \quad j \in N_k, k \in K \quad (22)$$

$$s_{jm} \in \{0, 1\} \quad j \in N, m \in \{1, 2, \dots, C\} \quad (31)$$

## Appendix B: Detailed Computational Results

**Table 1 N25 Results under Cooperative EV User Response**

| Configuration |         |                | $R = 15$ |          |             |            |            |                |                  |          | $R = 20$ |             |            |            |                |                  |          |          | $R = 25$    |            |            |                |                  |  |  |  |
|---------------|---------|----------------|----------|----------|-------------|------------|------------|----------------|------------------|----------|----------|-------------|------------|------------|----------------|------------------|----------|----------|-------------|------------|------------|----------------|------------------|--|--|--|
| Dev Tol       | $\beta$ | $\alpha$ (min) | $\sum y$ | $\sum z$ | Obj (\$Mil) | Avg Dev(%) | Max Dev(%) | Gurobi Time(s) | Algo Sol Time(s) | $\sum y$ | $\sum z$ | Obj (\$Mil) | Avg Dev(%) | Max Dev(%) | Gurobi Time(s) | Algo Sol Time(s) | $\sum y$ | $\sum z$ | Obj (\$Mil) | Avg Dev(%) | Max Dev(%) | Gurobi Time(s) | Algo Sol Time(s) |  |  |  |
| 0%            | 95%     | 30             | 8        | 125      | 10.575      | -          | -          | 1.80           | 6.03             | 5        | 67       | 5.775       | -          | -          | 0.56           | 4.68             | 3        | 32       | 2.85        | -          | -          | 0.47           | 2.44             |  |  |  |
|               |         | 10             | 8        | 141      | 11.775      | -          | -          | 4.48           | 5.48             | 5        | 76       | 6.45        | -          | -          | 1.21           | 4.08             | 3        | 36       | 3.15        | -          | -          | 0.53           | 2.44             |  |  |  |
|               |         | 5              | 8        | 149      | 12.375      | -          | -          | 2.09           | 5.49             | 5        | 80       | 6.75        | -          | -          | 1.47           | 4.16             | 3        | 38       | 3.30        | -          | -          | 0.29           | 2.37             |  |  |  |
|               | 90%     | 1              | 8        | 159      | 13.125      | -          | -          | 2.10           | 5.41             | 5        | 86       | 7.20        | -          | -          | 1.21           | 4.27             | 3        | 40       | 3.45        | -          | -          | 0.43           | 2.41             |  |  |  |
|               |         | 30             | 8        | 122      | 10.35       | -          | -          | 2.62           | 5.86             | 5        | 65       | 5.625       | -          | -          | 1.61           | 4.66             | 3        | 31       | 2.775       | -          | -          | 0.27           | 2.36             |  |  |  |
|               |         | 10             | 8        | 134      | 11.25       | -          | -          | 2.91           | 6.54             | 5        | 72       | 6.15        | -          | -          | 0.90           | 4.04             | 3        | 34       | 3.00        | -          | -          | 0.55           | 2.32             |  |  |  |
|               | 80%     | 5              | 8        | 141      | 11.775      | -          | -          | 1.86           | 5.90             | 5        | 76       | 6.45        | -          | -          | 2.19           | 4.08             | 3        | 36       | 3.15        | -          | -          | 0.32           | 2.35             |  |  |  |
|               |         | 1              | 8        | 150      | 12.45       | -          | -          | 1.57           | 5.78             | 5        | 80       | 6.75        | -          | -          | 1.43           | 4.24             | 3        | 38       | 3.30        | -          | -          | 0.39           | 2.36             |  |  |  |
|               |         | 30             | 8        | 118      | 10.05       | -          | -          | 2.62           | 6.23             | 5        | 62       | 5.40        | -          | -          | 1.09           | 4.97             | 3        | 30       | 2.70        | -          | -          | 0.55           | 2.36             |  |  |  |
|               |         | 10             | 8        | 127      | 10.725      | -          | -          | 1.92           | 5.95             | 5        | 68       | 5.85        | -          | -          | 0.86           | 4.09             | 3        | 32       | 2.85        | -          | -          | 0.47           | 2.34             |  |  |  |
|               |         | 5              | 8        | 132      | 11.10       | -          | -          | 1.76           | 5.37             | 5        | 71       | 6.075       | -          | -          | 1.62           | 4.12             | 3        | 34       | 3.00        | -          | -          | 0.64           | 2.48             |  |  |  |
|               |         | 1              | 8        | 139      | 11.625      | -          | -          | 1.90           | 5.53             | 5        | 74       | 6.30        | -          | -          | 1.66           | 4.30             | 3        | 35       | 3.075       | -          | -          | 0.29           | 2.35             |  |  |  |
|               |         |                |          |          |             |            |            |                |                  |          |          |             |            |            |                |                  |          |          |             |            |            |                |                  |  |  |  |
| 10%           | 95%     | 30             | 8        | 125      | 10.575      | 0          | 0          | 37.63          | 5.73             | 5        | 67       | 5.775       | 0          | 0          | 3.32           | 5.08             | 3        | 32       | 2.85        | 0          | 0          | 1.00           | 2.35             |  |  |  |
|               |         | 10             | 8        | 141      | 11.775      | 0          | 0          | 79.01          | 5.21             | 5        | 76       | 6.45        | 0          | 0          | 13.12          | 4.03             | 3        | 36       | 3.15        | 0          | 0          | 1.71           | 2.36             |  |  |  |
|               |         | 5              | 8        | 149      | 12.375      | 0          | 0          | 64.78          | 5.31             | 5        | 80       | 6.75        | 0          | 0          | 23.86          | 4.12             | 3        | 38       | 3.30        | 0          | 0          | 1.02           | 2.36             |  |  |  |
|               | 90%     | 1              | 8        | 159      | 13.125      | 0          | 0          | 57.49          | 5.17             | 5        | 86       | 7.20        | 0          | 0          | 50.26          | 4.20             | 3        | 40       | 3.45        | 0          | 0          | 0.87           | 2.35             |  |  |  |
|               |         | 30             | 8        | 122      | 10.35       | 0          | 0          | 70.88          | 5.56             | 5        | 65       | 5.625       | 0          | 0          | 4.47           | 4.51             | 3        | 31       | 2.775       | 0          | 0          | 0.90           | 2.33             |  |  |  |
|               |         | 10             | 8        | 134      | 11.25       | 0          | 0          | 54.89          | 5.85             | 5        | 72       | 6.15        | 0          | 0          | 8.46           | 4.13             | 3        | 34       | 3.00        | 0          | 0          | 1.34           | 2.33             |  |  |  |
|               | 80%     | 5              | 8        | 141      | 11.775      | 0          | 0          | 53.86          | 5.60             | 5        | 76       | 6.45        | 0          | 0          | 39.63          | 4.01             | 3        | 36       | 3.15        | 0          | 0          | 1.22           | 2.35             |  |  |  |
|               |         | 1              | 8        | 150      | 12.45       | 0          | 0          | 96.37          | 5.48             | 5        | 80       | 6.75        | 0          | 0          | 43.98          | 4.16             | 3        | 38       | 3.30        | 0          | 0          | 1.66           | 2.34             |  |  |  |
|               |         | 30             | 8        | 118      | 10.05       | 0          | 0          | 30.36          | 5.64             | 5        | 62       | 5.40        | 0          | 0          | 5.92           | 5.24             | 3        | 30       | 2.70        | 0          | 0          | 0.79           | 2.31             |  |  |  |
|               |         | 10             | 8        | 127      | 10.725      | 0          | 0          | 54.77          | 5.42             | 5        | 68       | 5.85        | 0          | 0          | 31.09          | 3.96             | 3        | 32       | 2.85        | 0          | 0          | 1.46           | 2.30             |  |  |  |
|               |         | 5              | 8        | 132      | 11.10       | 0          | 0          | 60.02          | 5.10             | 5        | 71       | 6.075       | 0          | 0          | 7.84           | 4.10             | 3        | 34       | 3.00        | 0          | 0          | 1.59           | 2.39             |  |  |  |
|               |         | 1              | 8        | 139      | 11.625      | 0          | 0          | 46.81          | 5.34             | 5        | 74       | 6.30        | 0          | 0          | 39.12          | 4.28             | 3        | 35       | 3.075       | 0          | 0          | 1.18           | 2.33             |  |  |  |
|               |         |                |          |          |             |            |            |                |                  |          |          |             |            |            |                |                  |          |          |             |            |            |                |                  |  |  |  |
| 25%           | 95%     | 30             | 6        | 123      | 10.125      | 1.74       | 21.43      | 260.32         | 4.07             | 3        | 63       | 5.175       | 2.44       | 22.22      | 42.43          | 2.80             | 2        | 31       | 2.625       | 0.6        | 13.04      | 5.21           | 1.88             |  |  |  |
|               |         | 10             | 6        | 135      | 11.025      | 1.74       | 21.43      | 432.03         | 4.03             | 3        | 70       | 5.70        | 1.49       | 16.67      | 10.94          | 2.83             | 2        | 34       | 2.85        | 0.6        | 13.04      | 7.55           | 1.85             |  |  |  |
|               |         | 5              | 6        | 143      | 11.625      | 1.74       | 21.43      | 519.97         | 4.06             | 3        | 74       | 6.00        | 1.49       | 16.67      | 50.22          | 2.82             | 2        | 36       | 3.00        | 1.78       | 22.73      | 6.31           | 1.87             |  |  |  |
|               | 90%     | 1              | 6        | 152      | 12.30       | 1.74       | 21.43      | 437.18         | 4.12             | 3        | 79       | 6.375       | 1.49       | 16.67      | 24.17          | 2.83             | 2        | 38       | 3.15        | 0.45       | 13.04      | 37.06          | 1.86             |  |  |  |
|               |         | 30             | 6        | 119      | 9.825       | 1.74       | 21.43      | 186.63         | 4.05             | 3        | 62       | 5.10        | 2.44       | 22.22      | 11.05          | 2.84             | 2        | 30       | 2.55        | 0.46       | 13.04      | 6.99           | 1.86             |  |  |  |
|               |         | 10             | 6        | 130      | 10.65       | 1.74       | 21.43      | 312.39         | 4.05             | 3        | 67       | 5.475       | 2.44       | 22.22      | 19.67          | 2.90             | 2        | 32       | 2.70        | 0.45       | 13.04      | 5.60           | 1.84             |  |  |  |
|               | 80%     | 5              | 6        | 136      | 11.10       | 1.74       | 21.43      | 340.21         | 4.03             | 3        | 70       | 5.70        | 2.44       | 22.22      | 34.66          | 3.00             | 2        | 34       | 2.85        | 0.45       | 13.04      | 6.12           | 1.86             |  |  |  |
|               |         | 1              | 6        | 145      | 11.775      | 1.74       | 21.43      | 757.12         | 4.12             | 3        | 75       | 6.075       | 2.44       | 22.22      | 106.45         | 2.82             | 2        | 36       | 3.00        | 0.46       | 13.04      | 5.22           | 1.90             |  |  |  |
|               |         | 30             | 6        | 116      | 9.60        | 1.74       | 21.43      | 119.71         | 4.13             | 3        | 60       | 4.95        | 2.44       | 22.22      | 10.91          | 2.85             | 2        | 29       | 2.475       | 0.45       | 13.04      | 9.76           | 1.88             |  |  |  |
|               |         | 10             | 6        | 124      | 10.20       | 1.74       | 21.43      | 242.59         | 4.09             | 3        | 64       | 5.25        | 1.49       | 16.67      | 12.98          | 2.85             | 2        | 31       | 2.625       | 0.23       | 13.04      | 6.00           | 1.85             |  |  |  |
|               |         | 5              | 6        | 129      | 10.575      | 1.74       | 21.43      | 295.89         | 4.14             | 3        | 67       | 5.475       | 2.44       | 22.22      | 14.63          | 2.81             | 2        | 32       | 2.70        | 0.45       | 13.04      | 7.34           | 1.87             |  |  |  |
|               |         | 1              | 6        | 135      | 11.025      | 1.74       | 21.43      | 287.59         | 4.00             | 3        | 70       | 5.70        | 1.49       | 22.22      | 11.18          | 2.85             | 2        | 34       | 2.85        | 0.45       | 13.04      | 6.67           | 1.85             |  |  |  |
|               |         |                |          |          |             |            |            |                |                  |          |          |             |            |            |                |                  |          |          |             |            |            |                |                  |  |  |  |
| 50%           | 95%     | 30             | 5        | 121      | 9.825       | 4.12       | 38.46      | 490.50         | 3.76             | 2        | 63       | 5.025       | 5.67       | 44.44      | 6.66           | 2.34             | 2        | 30       | 2.55        | 3.85       | 39.13      | 19.49          | 1.67             |  |  |  |
|               |         | 10             | 5        | 133      | 10.725      | 4.12       | 38.46      | 837.50         | 3.75             | 2        | 69       | 5.475       | 5.67       | 44.44      | 7.58           | 2.30             | 2        | 34       | 2.85        | 0.46       | 13.04      | 15.01          | 1.67             |  |  |  |
|               |         | 5              | 5        | 140      | 11.25       | 4.12       | 38.46      | 1109.32        | 3.72             | 2        | 72       | 5.70        | 5.67       | 44.44      | 5.66           | 2.29             | 2        | 36       | 3.00        | 0.46       | 13.04      | 26.24          | 1.67             |  |  |  |
|               | 90%     | 1              | 5        | 149      | 11.925      | 4.12       | 38.46      | 1346.00        | 3.79             | 2        | 77       | 6.075       | 5.67       | 44.44      | 6.59           | 2.29             | 2        | 38       | 3.15        | 2.91       | 30.43      | 59.52          | 1.68             |  |  |  |
|               |         | 30             | 5        | 119      | 9.675       | 4.12       | 38.46      | 1487.53        | 3.72             | 2        | 62       | 4.95        | 5.67       | 44.44      | 4.59           | 2.28             | 2        | 30       | 2.55        | 1.78       | 22.73      | 21.67          | 1.67             |  |  |  |
|               |         | 10             | 5        | 128      | 10.35       | 4.12       | 38.46      | 693.80         | 3.75             | 2        | 67       | 5.325       | 5.67       | 44.44      | 5.35           | 2.32             | 2        | 32       | 2.70        | 2.91       | 30.43      | 25.28          | 1.71             |  |  |  |
|               | 80%     | 5              | 5        | 134      | 10.80       | 4.12       | 38.46      | 1426.74        | 3.73             | 2        | 70       | 5.55        | 5.67       | 44.44      | 10.20          | 2.33             | 2        | 34       | 2.85        | 0.23       | 13.04      | 70.60          | 1.68             |  |  |  |
|               |         | 1              | 5        | 142      | 11.40       | 4.12       | 38.46      | 1275.94        | 3.77             | 2        | 73       | 5.775       | 5.67       | 44.44      | 13.89          | 2.31             | 2        | 36       | 3.00        | 1.87       | 26.09      | 72.84          | 1.68             |  |  |  |
|               |         | 30             | 5        | 116      | 9.45        | 4.12       | 38.46      | 519.05         | 3.72             | 2        | 61       | 4.875       | 5.67       | 44.44      | 5.23           | 2.31             | 2        | 29       | 2.475       | 0.46       | 13.04      | 181.38         | 1.67             |  |  |  |
|               |         | 10             | 5        | 123      | 9.975       | 5.58       | 46.15      | 1630.37        | 3.78             | 2        | 65       | 5.175       | 5.67       | 44.44      | 10.22          | 2.30             | 2        | 31       | 2.625       | 0.46       | 13.04      | 16.77          | 1.68             |  |  |  |
|               |         | 5              | 5        | 127      | 10.275      | 4.12       | 38.46      | 802.30         | 3.73             | 2        | 67       | 5.325       | 5.67       | 44.44      | 5.99           | 2.32             | 2        | 32       | 2.70        | 0.46       | 13.04      | 81.06          | 1.67             |  |  |  |
|               |         | 1              | 5        | 133      | 10.725      | 4.12       | 38.46      | 935.82         | 3.73             | 2        | 70       | 5.55        | 5.67       | 44.44      | 7.53           | 2.31             | 2        | 34       | 2.85        | 0.45       | 13.04      | 61.61          | 1.67             |  |  |  |
|               |         |                |          |          |             |            |            |                |                  |          |          |             |            |            |                |                  |          |          |             |            |            |                |                  |  |  |  |

**Table 2 Algorithm Results on CA339 Instances under Cooperative EV User Response**

| Configuration |         |                | Cooperative |          |             |            |            |                   |             |                          |
|---------------|---------|----------------|-------------|----------|-------------|------------|------------|-------------------|-------------|--------------------------|
| R             | Dev Tol | $\alpha$ (min) | $\sum y$    | $\sum z$ | Obj (\$Mil) | Avg Dev(%) | Max Dev(%) | # Cuts (41), (42) | # Cuts (43) | Iterations -# Cuts (48)- |
| 250           | 0%      | 30             | 4           | 190      | 14.85       | -          | -          | 762               | 0           | 2175                     |
|               |         | 10             | 4           | 198      | 15.45       | -          | -          | 762               | 0           | 2229                     |
|               |         | 5              | 4           | 204      | 15.90       | -          | -          | 762               | 0           | 2233                     |
|               | 10%     | 1              | 4           | 214      | 16.65       | -          | -          | 762               | 0           | 2233                     |
|               |         | 30             | 3           | 180      | 13.95       | 0.79       | 5.02       | 1132              | 0           | 2167                     |
|               |         | 10             | 3           | 187      | 14.475      | 0.79       | 5.02       | 1132              | 0           | 2167                     |
|               | 25%     | 5              | 3           | 192      | 14.85       | 0.66       | 9.22       | 1130              | 0           | 2132                     |
|               |         | 1              | 3           | 201      | 15.525      | 0.79       | 5.02       | 1090              | 0           | 2032                     |
|               |         | 30             | 2           | 178      | 13.65       | 0.88       | 20.60      | 4388              | 0           | 1709                     |
|               | 50%     | 10             | 2           | 184      | 14.10       | 0.88       | 20.60      | 4388              | 0           | 1767                     |
|               |         | 5              | 2           | 188      | 14.40       | 0.88       | 20.60      | 4388              | 0           | 1770                     |
|               |         | 1              | 2           | 198      | 15.15       | 0.77       | 23.43      | 4388              | 0           | 1710                     |
|               | 1       | 30             | 2           | 178      | 13.65       | 0.88       | 20.60      | 9870              | 0           | 1593                     |
|               |         | 10             | 2           | 184      | 14.10       | 0.88       | 20.60      | 9870              | 0           | 1592                     |
|               |         | 5              | 2           | 188      | 14.40       | 0.88       | 20.60      | 9870              | 0           | 1587                     |
| 200           | 0%      | 1              | 2           | 198      | 15.15       | 0.88       | 20.60      | 9870              | 0           | 1588                     |
|               |         | 7              | 7           | 330      | 25.80       | -          | -          | 1030              | 0           | 2491                     |
|               |         | 10             | 7           | 345      | 26.925      | -          | -          | 1030              | 0           | 2490                     |
| 10%           | 5       | 7              | 356         | 27.75    | -           | -          | 1030       | 0                 | 2488        |                          |
|               | 1       | 7              | 374         | 29.10    | -           | -          | 1030       | 0                 | 2492        |                          |
|               | 30      | 5              | 319         | 24.675   | 1.01        | 9.54       | 1470       | 16                | 2446        |                          |
| 25%           | 10      | 5              | 328         | 25.35    | 0.97        | 9.54       | 1470       | 16                | 2434        |                          |
|               | 5       | 5              | 336         | 25.95    | 1.01        | 9.54       | 1470       | 16                | 2389        |                          |
|               | 1       | 5              | 351         | 27.075   | 1.01        | 9.54       | 1470       | 16                | 2270        |                          |
| 50%           | 30      | 3              | 319         | 24.375   | 2.38        | 22.68      | 2510       | 0                 | 2309        |                          |
|               | 10      | 3              | 327         | 24.975   | 2.38        | 22.68      | 2510       | 0                 | 2231        |                          |
|               | 5       | 3              | 334         | 25.50    | 1.77        | 22.29      | 2510       | 0                 | 2247        |                          |
| 1             | 30      | 3              | 348         | 26.55    | 1.90        | 22.29      | 2510       | 0                 | 2257        |                          |
|               | 10      | 3              | 310         | 23.70    | 3.35        | 40.94      | 11,692     | 0                 | 1309        |                          |
|               | 5       | 3              | 318         | 24.30    | 7.07        | 49.35      | 11,692     | 0                 | 1342        |                          |
| 1             | 5       | 3              | 326         | 24.90    | 7.78        | 49.35      | 11,692     | 0                 | 1215        |                          |
|               | 1       | 3              | 339         | 25.875   | 7.07        | 49.35      | 11,692     | 0                 | 1380        |                          |

**Table 3 Algorithm Results on US-E420 Instances under Cooperative EV User Response**

| Configuration |         |                | Cooperative |          |             |            |            |                   |             |                          |    |
|---------------|---------|----------------|-------------|----------|-------------|------------|------------|-------------------|-------------|--------------------------|----|
| R             | Dev Tol | $\alpha$ (min) | $\sum y$    | $\sum z$ | Obj (\$Mil) | Avg Dev(%) | Max Dev(%) | # Cuts (41), (42) | # Cuts (43) | Iterations -# Cuts (48)- |    |
| 600           | 0%      | 30             | 55          | 586      | 52.20       | -          | -          | 1264              | 0           | 2126                     |    |
|               |         | 10             | 55          | 653      | 57.225      | -          | -          | 1264              | 0           | 2119                     |    |
|               |         | 5              | 55          | 693      | 60.225      | -          | -          | 1264              | 0           | 2129                     |    |
|               | 10%     | 1              | 55          | 734      | 63.30       | -          | -          | 1264              | 0           | 2120                     |    |
|               |         | 30             | 39          | 548      | 46.95       | 1.41       | 9.57       | 1166              | 0           | 2710                     |    |
|               |         | 10             | 39          | 606      | 51.30       | 1.42       | 9.57       | 1166              | 0           | 2705                     |    |
|               | 25%     | 5              | 39          | 638      | 53.70       | 1.42       | 9.57       | 1166              | 0           | 2712                     |    |
|               |         | 1              | 39          | 673      | 56.325      | 1.41       | 9.57       | 1166              | 0           | 2705                     |    |
|               |         | 30             | 31          | 535      | 44.775      | 5.89       | 24.72      | 2674              | 585         | 1117                     |    |
|               | 50%     | 10             | 31          | 585      | 48.525      | 5.92       | 24.72      | 2674              | 585         | 1116                     |    |
|               |         | 5              | 31          | 613      | 50.625      | 5.80       | 24.31      | 2674              | 585         | 1117                     |    |
|               |         | 1              | 31          | 652      | 53.55       | 5.80       | 24.72      | 2674              | 585         | 1043                     |    |
|               | 400     | 0%             | 30          | 25       | 536         | 43.95      | 9.08       | 48.29             | 8732        | 315                      | 62 |
|               |         |                | 10          | 25       | 583         | 47.475     | 9.08       | 48.29             | 8720        | 304                      | 58 |
|               |         |                | 5           | 25       | 606         | 49.20      | 9.08       | 48.29             | 8732        | 304                      | 60 |
| 10%           | 1       | 1              | 25          | 648      | 52.35       | 9.08       | 48.29      | 8732              | 304         | 59                       |    |
|               |         | 30             | 97          | 1009     | 90.225      | -          | -          | 1852              | 0           | 1826                     |    |
|               |         | 10             | 97          | 1130     | 99.30       | -          | -          | 1852              | 0           | 1760                     |    |
|               | 25%     | 5              | 97          | 1196     | 104.25      | -          | -          | 1852              | 0           | 1916                     |    |
|               |         | 1              | 97          | 1270     | 109.80      | -          | -          | 1852              | 0           | 1903                     |    |
|               |         | 30             | 79          | 984      | 85.65       | 1.86       | 9.56       | 2132              | 134         | 1435                     |    |
|               | 50%     | 10             | 79          | 1089     | 93.525      | 1.96       | 9.60       | 2132              | 134         | 1450                     |    |
|               |         | 5              | 79          | 1142     | 97.50       | 2.07       | 9.85       | 2132              | 134         | 1458                     |    |
|               |         | 1              | 79          | 1218     | 103.20      | 1.86       | 9.56       | 2132              | 134         | 1513                     |    |
|               | 1       | 30             | 30          | 65       | 974         | 82.80      | 6.12       | 24.62             | 4934        | 1488                     | 71 |
|               |         |                | 10          | 65       | 1068        | 89.85      | 6.12       | 24.62             | 4930        | 1444                     | 66 |
|               |         |                | 5           | 65       | 1119        | 93.675     | 6.12       | 24.62             | 4934        | 1488                     | 71 |
|               | 50%     | 1              | 65          | 1188     | 98.85       | 6.12       | 24.62      | 4930              | 1451        | 67                       |    |
|               |         | 30             | 51          | 999      | 82.575      | 13.0       | 49.52      | 14,072            | 678         | 1                        |    |
|               |         | 10             | 51          | 1085     | 89.025      | 13.0       | 49.52      | 14,072            | 678         | 1                        |    |
| 1             | 5       | 51             | 1137        | 92.925   | 13.0        | 49.52      | 14,072     | 678               | 1           |                          |    |
|               | 1       | 51             | 1203        | 97.875   | 13.0        | 49.52      | 14,072     | 678               | 1           |                          |    |

**Table 4 Comparison of Solution Quality and Computation Time for Varying Variable Charging Stall Cost**

| Configuration |         | stall=\$75,000 |                     | stall=\$100,000 |                     | stall=\$150,000 |                     | stall=\$200,000 |                     | stall=\$300,000 |                     |
|---------------|---------|----------------|---------------------|-----------------|---------------------|-----------------|---------------------|-----------------|---------------------|-----------------|---------------------|
| <i>R</i>      | Dev Tol | Mean Gap(%)    | Mean Gurobi Time(s) | Mean Gap(%)     | Mean Gurobi Time(s) | Mean Gap(%)     | Mean Gurobi Time(s) | Mean Gap(%)     | Mean Gurobi Time(s) | Mean Gap(%)     | Mean Gurobi Time(s) |
| 15            | 0%      | 0              | 2.3                 | 0               | 5.8                 | 0               | 4.6                 | 0               | 37.2                | 0               | 10.9                |
|               | 10%     | 0              | 58.9                | 0.03            | 129.3               | 0.07            | 64.4                | 0.13            | 590.2               | 0.20            | 242.2               |
|               | 25%     | 0              | 349.3               | 0.16            | 571.4               | 0.32            | 630.3               | 0.45            | 1682.0              | 0.53            | 1927.7              |
| 20            | 50%     | 0              | 1046.3              | 0.06            | 1438.8              | 0.06            | 1071.1              | 0.05            | 2418.7              | 0.09            | 2965.9              |
|               | 0%      | 0              | 1.3                 | 0               | 2.0                 | 0               | 1.5                 | 0               | 15.9                | 0               | 2.3                 |
|               | 10%     | 0              | 22.6                | 0               | 23.6                | 0               | 24.7                | 0               | 196.1               | 0               | 60.2                |
|               | 25%     | 0              | 29.1                | 0               | 67.0                | 0               | 45.1                | 0               | 101.5               | 0               | 94.1                |
|               | 50%     | 0              | 7.5                 | 0               | 15.0                | 0               | 11.4                | 0               | 71.7                | 0               | 78.4                |
| 25            | 0%      | 0              | 0.4                 | 0               | 0.5                 | 0               | 0.4                 | 0               | 1.0                 | 0               | 0.6                 |
|               | 10%     | 0              | 1.2                 | 0               | 1.9                 | 0               | 1.3                 | 0               | 4.3                 | 0               | 2.5                 |
|               | 25%     | 0              | 9.2                 | 0               | 7.7                 | 0               | 7.1                 | 0               | 18.5                | 0               | 15.1                |
|               | 50%     | 0              | 54.3                | 0               | 53.9                | 0               | 56.6                | 0               | 75.3                | 0               | 81.6                |
| Avg:          |         | <b>0.00</b>    | <b>131.9</b>        | <b>0.02</b>     | <b>190.6</b>        | <b>0.04</b>     | <b>159.9</b>        | <b>0.05</b>     | <b>434.4</b>        | <b>0.07</b>     | <b>456.8</b>        |

**Table 5 N25 Results under Cooperative and Uncooperative EV User Response**

| Configuration |         |         |                | Cooperative |          |             |            | Uncooperative |          |             |            | Difference |          |             |            |
|---------------|---------|---------|----------------|-------------|----------|-------------|------------|---------------|----------|-------------|------------|------------|----------|-------------|------------|
| <i>R</i>      | Dev Tol | $\beta$ | $\alpha$ (min) | $\sum y$    | $\sum z$ | Obj (\$Mil) | Avg Dev(%) | $\sum y$      | $\sum z$ | Obj (\$Mil) | Avg Dev(%) | $\sum y$   | $\sum z$ | Obj (\$Mil) | Avg Dev(%) |
| 15            | 0%      | 90%     | 30             | 8           | 122      | 10.35       | -          | 8             | 128      | 10.80       | -          | 0          | +6       | 4.35        | -          |
|               |         |         | 10             | 8           | 134      | 11.25       | -          | 8             | 141      | 11.775      | -          | 0          | +7       | 4.67        | -          |
|               |         |         | 1              | 8           | 150      | 12.45       | -          | 8             | 157      | 12.975      | -          | 0          | +7       | 4.22        | -          |
|               |         | 80%     | 30             | 8           | 118      | 10.05       | -          | 8             | 124      | 10.50       | -          | 0          | +6       | 4.48        | -          |
|               |         |         | 10             | 8           | 127      | 10.725      | -          | 8             | 133      | 11.175      | -          | 0          | +6       | 4.20        | -          |
|               |         |         | 1              | 8           | 139      | 11.625      | -          | 8             | 146      | 12.15       | -          | 0          | +7       | 4.52        | -          |
|               | 10%     | 90%     | 30             | 8           | 122      | 10.35       | 0.00       | 8             | 128      | 10.80       | 0.00       | 0          | +6       | 4.35        | 0.00       |
|               |         |         | 10             | 8           | 134      | 11.25       | 0.00       | 8             | 141      | 11.775      | 0.00       | 0          | +7       | 4.67        | 0.00       |
|               |         |         | 1              | 8           | 150      | 12.45       | 0.00       | 8             | 157      | 12.975      | 0.00       | 0          | +7       | 4.22        | 0.00       |
|               |         | 80%     | 30             | 8           | 118      | 10.05       | 0.00       | 8             | 124      | 10.50       | 0.00       | 0          | +6       | 4.48        | 0.00       |
|               |         |         | 10             | 8           | 127      | 10.725      | 0.00       | 8             | 133      | 11.175      | 0.00       | 0          | +6       | 4.20        | 0.00       |
|               |         |         | 1              | 8           | 139      | 11.325      | 0.00       | 8             | 146      | 12.15       | 0.00       | 0          | +7       | 4.52        | 0.00       |
|               | 25%     | 90%     | 30             | 6           | 119      | 9.825       | 1.74       | 6             | 123      | 10.125      | 1.74       | 0          | +4       | 3.05        | 0.00       |
|               |         |         | 10             | 6           | 130      | 10.65       | 1.74       | 6             | 134      | 10.95       | 1.74       | 0          | +4       | 2.82        | 0.00       |
|               |         |         | 1              | 6           | 145      | 11.775      | 1.74       | 6             | 150      | 12.15       | 1.74       | 0          | +5       | 3.18        | 0.00       |
|               |         | 80%     | 30             | 6           | 116      | 9.60        | 1.74       | 6             | 120      | 9.90        | 1.74       | 0          | +4       | 3.13        | 0.00       |
|               |         |         | 10             | 6           | 124      | 10.20       | 1.74       | 6             | 128      | 10.50       | 1.74       | 0          | +4       | 2.94        | 0.00       |
|               |         |         | 1              | 6           | 135      | 11.025      | 1.74       | 6             | 140      | 11.40       | 1.74       | 0          | +5       | 3.40        | 0.00       |
|               | 50%     | 90%     | 30             | 5           | 119      | 9.675       | 5.58       | 5             | 121      | 9.825       | 4.12       | 0          | +2       | 1.55        | -1.46      |
|               |         |         | 10             | 5           | 128      | 10.35       | 5.58       | 5             | 131      | 10.575      | 4.12       | 0          | +3       | 2.17        | -1.46      |
|               |         |         | 1              | 5           | 142      | 11.40       | 5.58       | 5             | 145      | 11.625      | 4.12       | 0          | +3       | 1.97        | -1.46      |
|               |         | 80%     | 30             | 5           | 116      | 9.45        | 5.58       | 5             | 119      | 9.675       | 3.97       | 0          | +3       | 2.38        | -1.61      |
|               |         |         | 10             | 5           | 123      | 9.975       | 5.58       | 5             | 125      | 10.125      | 4.12       | 0          | +2       | 1.50        | -1.46      |
|               |         |         | 1              | 5           | 133      | 10.725      | 4.12       | 5             | 137      | 11.025      | 4.12       | 0          | +4       | 2.80        | 0.00       |
| 20            | 0%      | 90%     | 30             | 5           | 65       | 5.625       | -          | 5             | 69       | 5.925       | -          | 0          | +4       | 5.33        | -          |
|               |         |         | 10             | 5           | 72       | 6.15        | -          | 5             | 77       | 6.525       | -          | 0          | +5       | 6.10        | -          |
|               |         |         | 1              | 5           | 80       | 6.75        | -          | 5             | 86       | 7.20        | -          | 0          | +6       | 6.67        | -          |
|               |         | 80%     | 30             | 5           | 62       | 5.40        | -          | 5             | 67       | 5.775       | -          | 0          | +5       | 6.94        | -          |
|               |         |         | 10             | 5           | 68       | 5.85        | -          | 5             | 72       | 6.15        | -          | 0          | +4       | 5.13        | -          |
|               |         |         | 1              | 5           | 74       | 6.30        | -          | 5             | 79       | 6.675       | -          | 0          | +5       | 5.95        | -          |
|               | 10%     | 90%     | 30             | 5           | 65       | 5.625       | 0.00       | 5             | 69       | 5.925       | 0.00       | 0          | +4       | 5.33        | 0.00       |
|               |         |         | 10             | 5           | 72       | 6.15        | 0.00       | 5             | 77       | 6.525       | 0.00       | 0          | +5       | 6.10        | 0.00       |
|               |         |         | 1              | 5           | 80       | 6.75        | 0.00       | 5             | 85       | 7.125       | 0.00       | 0          | +5       | 5.56        | +0.30      |
|               |         | 80%     | 30             | 5           | 62       | 5.40        | 0.00       | 5             | 67       | 5.775       | 0.00       | 0          | +5       | 6.94        | 0.00       |
|               |         |         | 10             | 5           | 68       | 5.85        | 0.00       | 5             | 72       | 6.15        | 0.00       | 0          | +4       | 5.13        | 0.00       |
|               |         |         | 1              | 5           | 74       | 6.30        | 0.00       | 5             | 79       | 6.675       | 0.00       | 0          | +5       | 5.95        | 0.00       |
|               | 25%     | 90%     | 30             | 3           | 62       | 5.10        | 1.49       | 3             | 64       | 5.25        | 1.49       | 0          | +2       | 2.94        | 0.00       |
|               |         |         | 10             | 3           | 67       | 5.475       | 1.49       | 3             | 69       | 5.625       | 1.49       | 0          | +2       | 2.74        | 0.00       |
|               |         |         | 1              | 3           | 75       | 6.075       | 1.49       | 3             | 77       | 6.225       | 1.49       | 0          | +2       | 2.47        | 0.00       |
|               |         | 80%     | 30             | 3           | 60       | 4.95        | 1.49       | 3             | 62       | 5.10        | 1.49       | 0          | +2       | 3.03        | 0.00       |
|               |         |         | 10             | 3           | 64       | 5.25        | 1.49       | 3             | 66       | 5.40        | 1.49       | 0          | +2       | 2.86        | 0.00       |
|               |         |         | 1              | 3           | 70       | 5.70        | 1.49       | 3             | 72       | 5.85        | 1.49       | 0          | +2       | 2.63        | 0.00       |
|               | 50%     | 90%     | 30             | 2           | 62       | 4.95        | 5.67       | 2             | 62       | 4.95        | 5.67       | 0          | 0        | 0.00        | 0.00       |
|               |         |         | 10             | 2           | 67       | 5.325       | 5.67       | 2             | 67       | 5.325       | 5.67       | 0          | 0        | 0.00        | 0.00       |
|               |         |         | 1              | 2           | 73       | 5.775       | 5.67       | 2             | 73       | 5.775       | 5.67       | 0          | 0        | 0.00        | 0.00       |
|               |         | 80%     | 30             | 2           | 61       | 4.875       | 5.67       | 2             | 61       | 4.875       | 5.67       | 0          | 0        | 0.00        | 0.00       |
|               |         |         | 10             | 2           | 65       | 5.175       | 5.67       | 2             | 65       | 5.175       | 5.67       | 0          | 0        | 0.00        | 0.00       |
|               |         |         | 1              | 2           | 70       | 5.55        | 5.67       | 2             | 70       | 5.55        | 5.67       | 0          | 0        | 0.00        | 0.00       |
| 25            | 0%      | 90%     | 30             | 3           | 31       | 2.775       | -          | 3             | 32       | 2.85        | -          | 0          | +1       | 2.70        | -          |
|               |         |         | 10             | 3           | 34       | 3.00        | -          | 3             | 36       | 3.15        | -          | 0          | +2       | 5.00        | -          |
|               |         |         | 1              | 3           | 38       | 3.30        | -          | 3             | 39       | 3.375       | -          | 0          | +1       | 2.27        | -          |
|               |         | 80%     | 30             | 3           | 30       | 2.70        | -          | 3             | 31       | 2.775       | -          | 0          | +1       | 2.78        | -          |
|               |         |         | 10             | 3           | 32       | 2.85        | -          | 3             | 33       | 2.925       | -          | 0          | +1       | 2.63        | -          |
|               |         |         | 1              | 3           | 35       | 3.075       | -          | 3             | 37       | 3.225       | -          | 0          | +2       | 4.88        | -          |
|               | 10%     | 90%     | 30             | 3           | 31       | 2.775       | 0.15       | 3             | 32       | 2.85        | 0.00       | 0          | +1       | 2.70        | -0.15      |
|               |         |         | 10             | 3           | 34       | 3.00        | 0.15       | 3             | 36       | 3.15        | 0.00       | 0          | +2       | 5.00        | -0.15      |
|               |         |         | 1              | 3           | 38       | 3.30        | 0.15       | 3             | 39       | 3.375       | 0.00       | 0          | +1       | 2.27        | -0.15      |
|               |         | 80%     | 30             | 3           | 30       | 2.70        | 0.15       | 3             | 31       | 2.775       | 0.00       | 0          | +1       | 2.78        | -0.15      |
|               |         |         | 10             | 3           | 32       | 2.85        | 0.15       | 3             | 33       | 2.925       | 0.00       | 0          | +1       | 2.63        | -0.15      |
|               |         |         | 1              | 3           | 35       | 3.075       | 0.15       | 3             | 37       | 3.225       | 0.00       | 0          | +2       | 4.88        | -0.15      |
|               | 25%     | 90%     | 30             | 2           | 30       | 2.55        | 0.46       | 2             | 30       | 2.55        | 1.78       | 0          | 0        | 0.00        | +1.32      |
|               |         |         | 10             | 2           | 32       | 2.70        | 0.45       | 2             | 32       | 2.70        | 1.78       | 0          | 0        | 0.00        | +1.33      |
|               |         |         | 1              | 2           | 36       | 3.00        | 0.45       | 2             | 36       | 3.00        | 1.78       | 0          | 0        | 0.00        | +1.33      |
|               |         | 80%     | 30             | 2           | 29       | 2.475       | 0.46       | 2             | 29       | 2.475       | 0.45       | 0          | 0        | 0.00        | -0.01      |
|               |         |         | 10             | 2           | 31       | 2.625       | 0.46       | 2             | 31       | 2.625       | 1.78       | 0          | 0        | 0.00        | +1.32      |
|               |         |         | 1              | 2           | 34       | 2.85        | 0.46       | 2             | 34       | 2.85        | 1.78       | 0          | 0        | 0.00        | +1.32      |
|               | 50%     | 90%     | 30             | 2           | 30       | 2.55        | 5.78       | 2             | 30       | 2.55        | 1.78       | 0          | 0        | 0.00        | -4.00      |
|               |         |         | 10             | 2           | 32       | 2.70        | 2.91       | 2             | 32       | 2.70        | 1.78       | 0          | 0        | 0.00        | -1.13      |
|               |         |         | 1              | 2           | 36       | 3.00        | 1.87       | 2             | 36       | 3.00        | 1.78       | 0          | 0        | 0.00        | -0.09      |
|               |         | 80%     | 30             | 2           | 29       | 2.475       | 5.78       | 2             | 29       | 2.475       | 0.45       | 0          | 0        | 0.00        | -5.33      |
|               |         |         | 10             | 2           | 31       | 2.625       | 5.78       | 2             | 31       | 2.625       | 1.78       | 0          | 0        | 0.00        | -4.00      |
|               |         |         | 1              | 2           | 34       | 2.85        | 1.87       | 2             | 34       | 2.85        | 1.78       | 0          | 0        | 0.00        | -0.09      |

## Appendix C: Additional Figures

Figure 1 Small benchmark network N25 (left) and California road network CA339 (right)

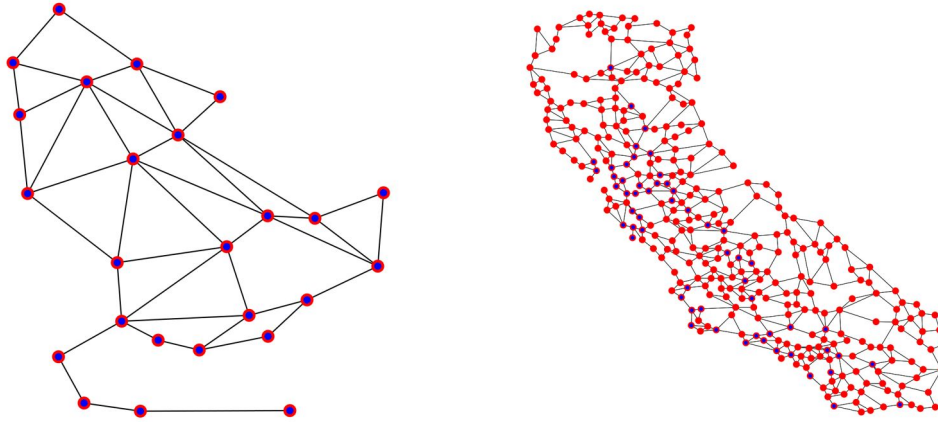

Figure 2 Eastern United States highway networks: raw US-E (left) and simplified US-E420 (right)

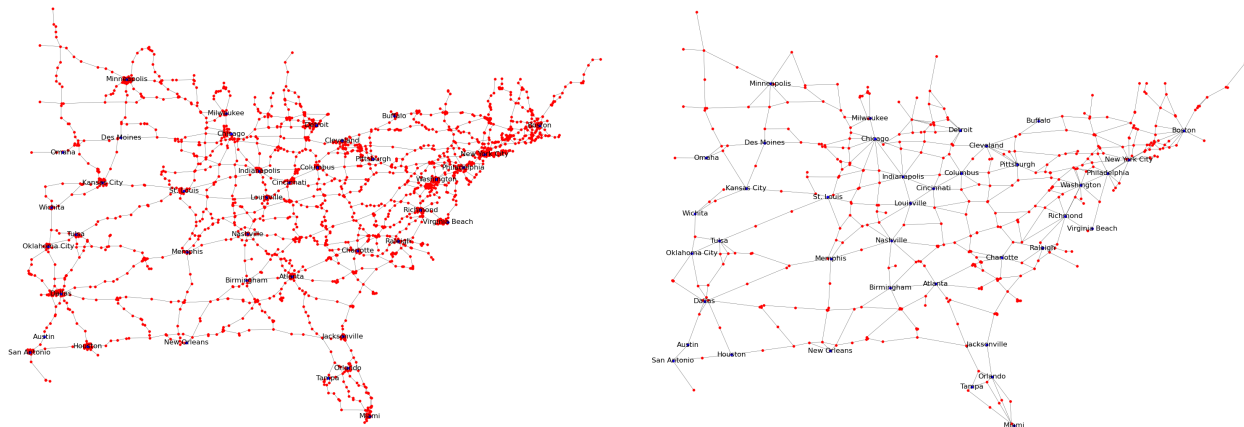

Figure 3 Average Solution Time Comparison for N25 instances

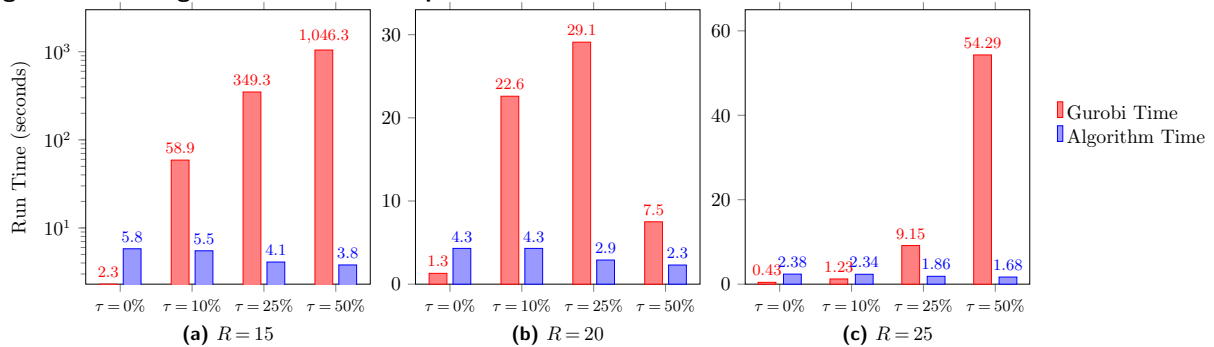

**Figure 4** Algorithm Performance Metrics for CA339 instances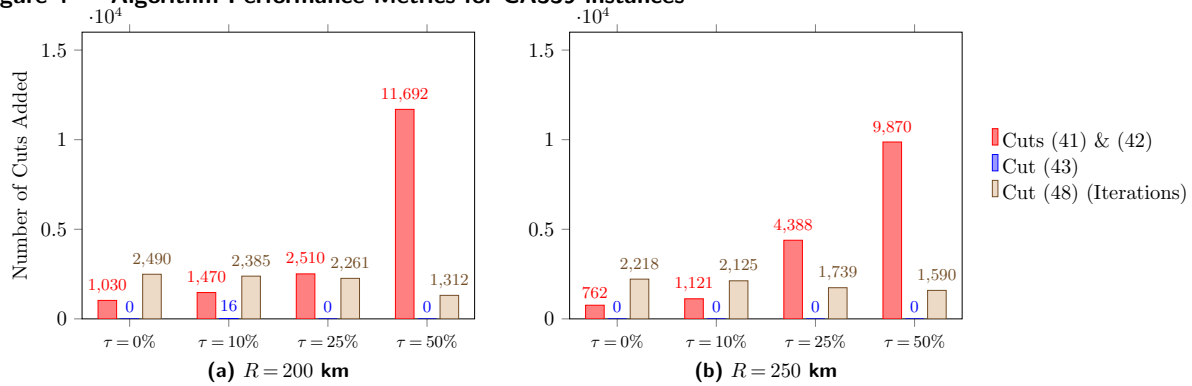**Figure 5** Algorithm Performance Metrics for US-E420 instances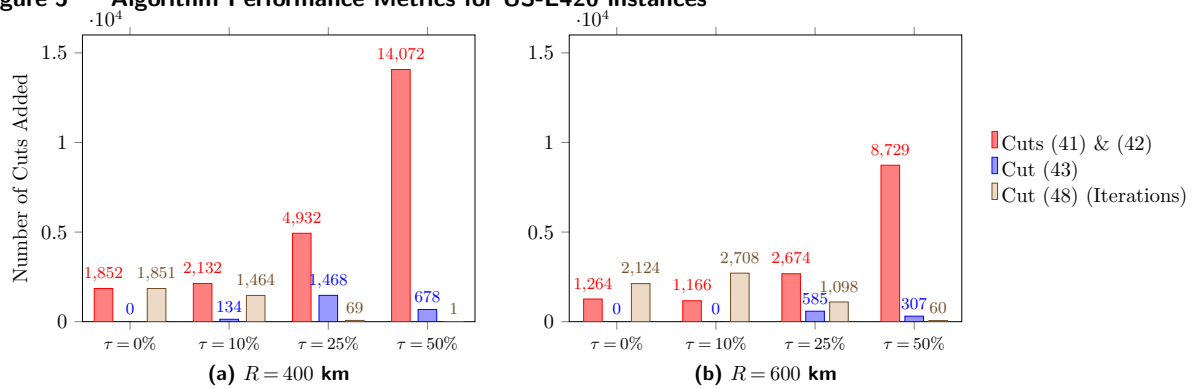**Figure 6** Objective value comparison of CA339 solutions,  $\beta = 90\%$ .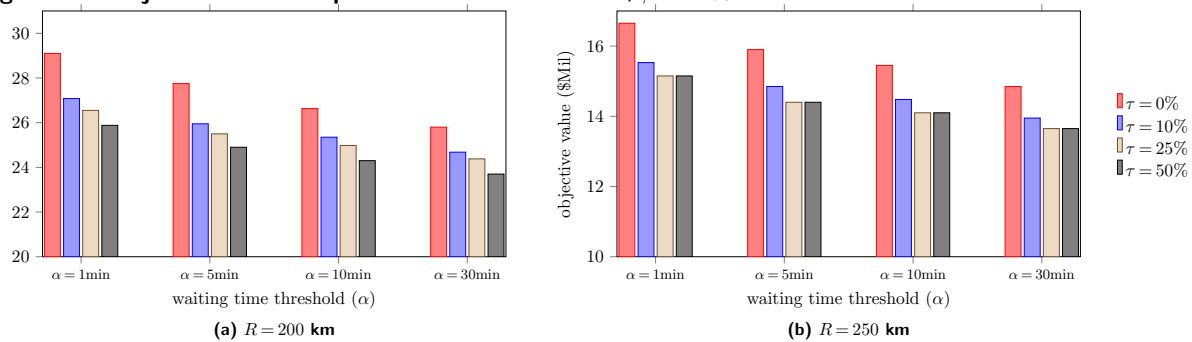**Figure 8** Objective value comparison of US-E420 solutions,  $\beta = 90\%$ .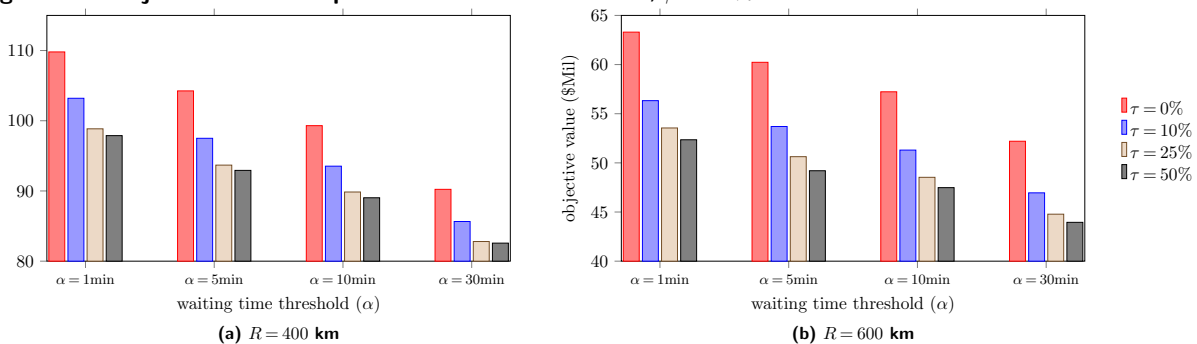

**Figure 7** Average and maximum deviation comparison of CA339 solutions,  $\alpha = 10$ ,  $\beta = 90\%$ .

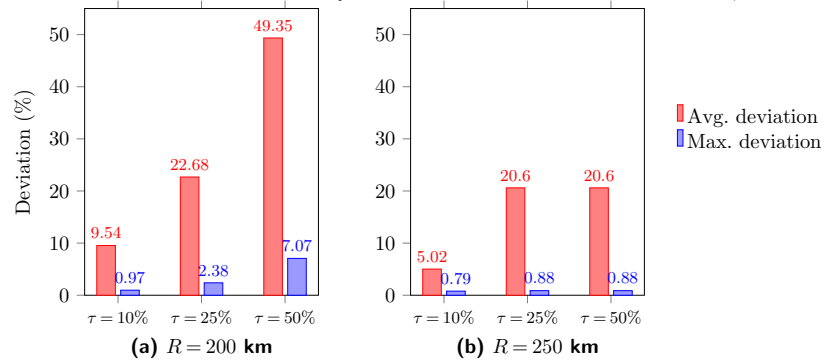

**Figure 9** Average and maximum deviation comparison of US-E420 solutions,  $\alpha=10$  min,  $\beta = 90\%$ .

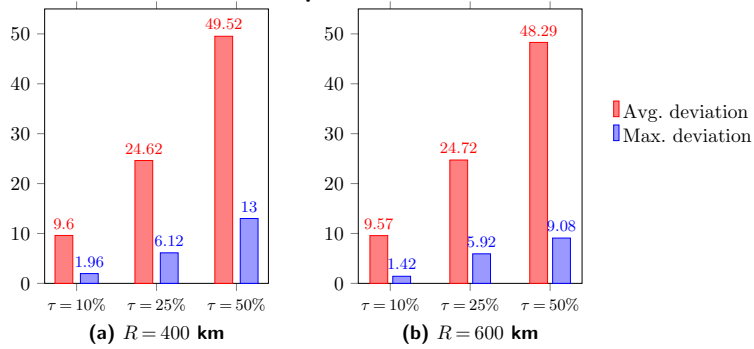

**Figure 10** US-E420  $\alpha = 10$  min,  $\beta = 90\%$  Solutions for  $\tau = 10\%$  and  $\tau = 50\%$ 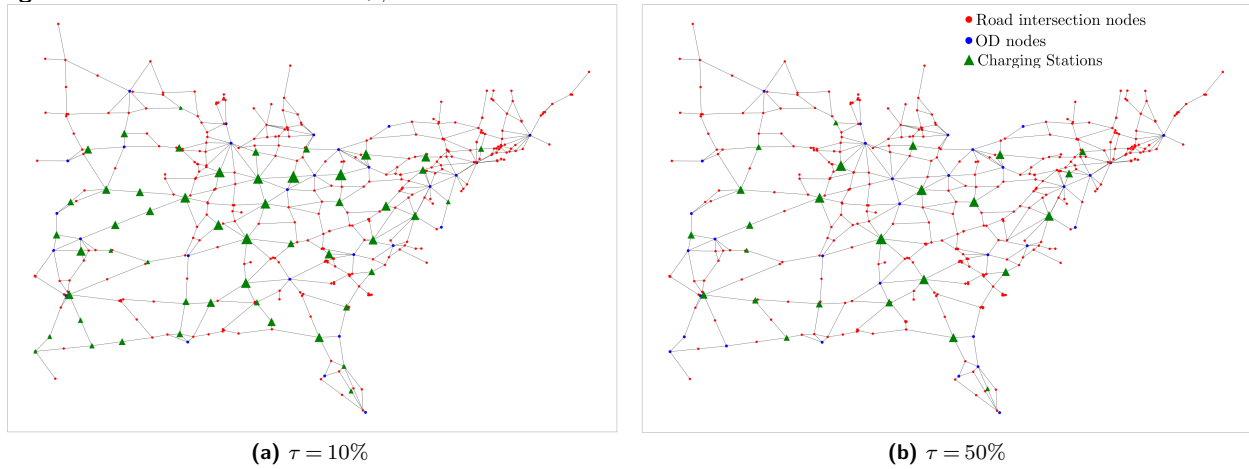**Figure 11** Deviation histograms for the number of charging stalls installed,  $\alpha = 10$  min,  $\beta = 90\%$ , (US-E420).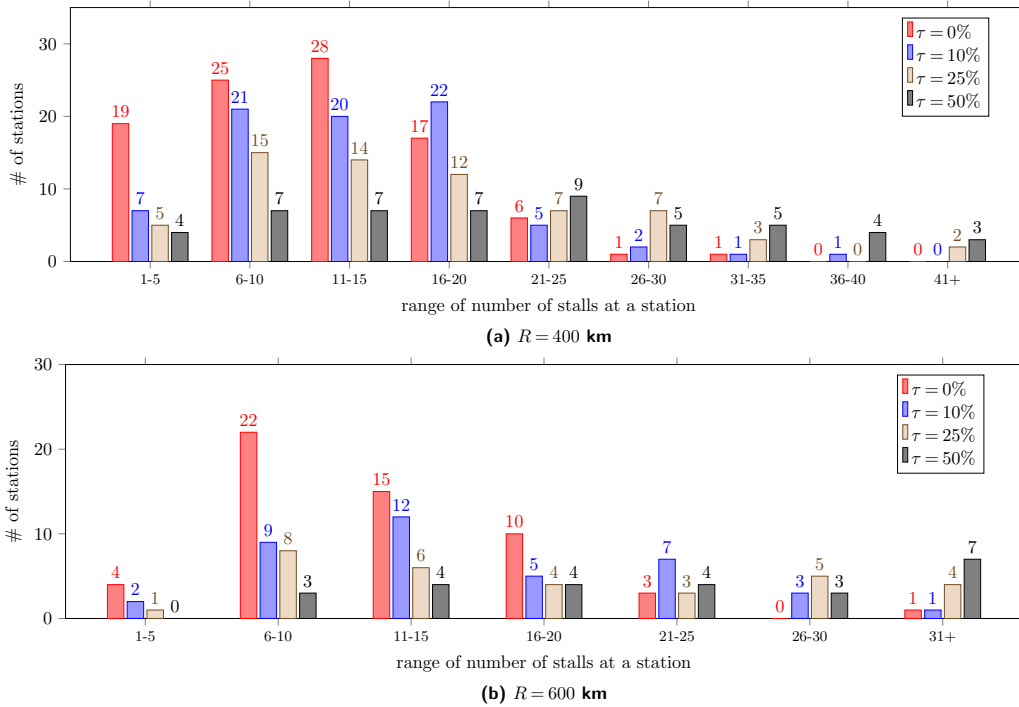

**Figure 12** Histograms for evaluating the impact of deviation tolerance on the type of OD pairs affected with respect to shortest path distance, (N25).

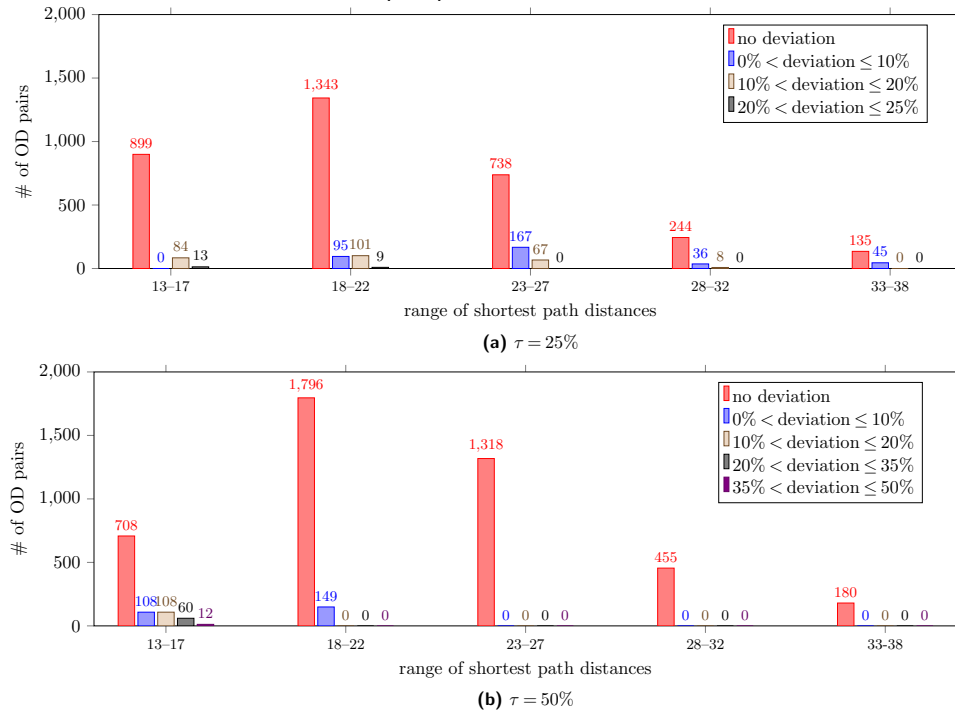

**Figure 13** Histograms for evaluating the impact of deviation tolerance on the type of OD pairs affected with respect to OD flow rate, (N25).

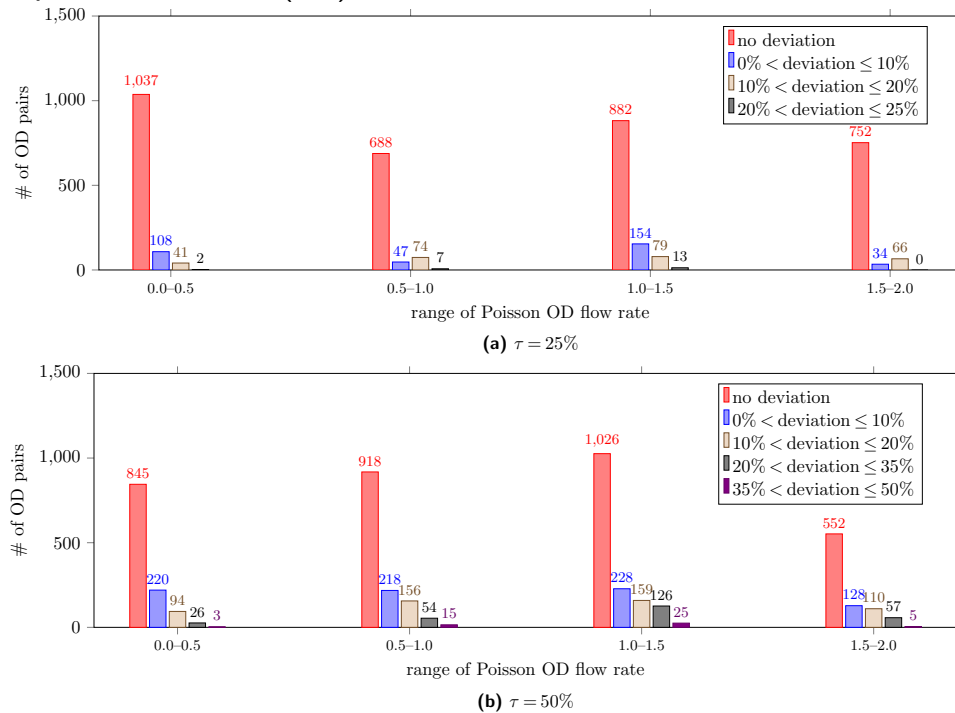

## Appendix D: Algorithm Pseudocodes

---

**Algorithm 1** The exact LBBA for the location problem  $P_L$

---

```

1: Initialization  $\rightarrow SP_k$  is infeasible
2: while  $SP_k$  is infeasible do
3:   SOLVE MP to obtain  $\bar{y}$ 
4:   for  $k \in K$  do
5:     SOLVE  $SP_k$  by a labeling algorithm on  $G_k^r$  to obtain  $\bar{x}$ 
6:     if  $SP_k$  is infeasible due to constraint (36) then
7:       SET  $\mathcal{N}_f$  and  $\mathcal{N}_b$ 
8:       ADD (41) and (42) to MP
9:     else if  $SP_k$  is feasible but constraint (10) is violated then
10:      ADD (43) to MP
11:    end if
12:  end for
13:  if all  $SP_k$  are feasible and (10) is satisfied then
14:    RETURN optimal solution as  $(\bar{y}, \bar{x})$ 
15:    BREAK while
16:  end if
17: end while

```

---



---

**Algorithm 2** Decomposition Based Algorithm (DA) for DLP

---

```

1:  $Incumbent \leftarrow +\infty$ 
2: while time or iteration limit is not reached do
3:   OBTAIN  $\bar{y}$  using LBBA
4:   SET  $\Psi_k(\bar{y})$  for each  $k \in K$  by a k-shortest path algorithm on  $G_k^r$ 
5:   SOLVE  $P_S$  to obtain  $\bar{u}$  and  $\bar{z}$ 
6:   SET  $\bar{x}$  based on  $\bar{u}$ 
7:    $tempObjective \leftarrow (1)$  for  $\bar{y}$  and  $\bar{z}$ 
8:   if  $tempObjective < Incumbent$  then
9:      $Incumbent \leftarrow tempObjective$ ,  $\mathbf{y}^* := \bar{y}$ ,  $\mathbf{x}^* := \bar{x}$  and  $\mathbf{z}^* := \bar{z}$ 
10:  end if
11:  ADD (48) to MP
12: end while
13: RETURN  $Incumbent$  and  $(\mathbf{y}^*, \mathbf{x}^*, \mathbf{z}^*)$ 

```

---
